# Supplementary material for: Eukaryotic Richness in the Abyss: Insights from Pyrotag Sequencing
Source: PLoS One. 2011 Apr 4;6(4):e18169. doi: 10.1371/journal.pone.0018169 (PMC3070721; doi:10.1371/journal.pone.0018169)
Supplement: Table S3 — MIMARKS data. (XLS) [file pone.0018169.s004.xls]

## Sheet: Sheet1
GROUP	Structured Comment Name	Units	DSE_0001_2008_08_11	DSE_0002_2008_08_11	DSE_0003_2008_08_11	DSE_0004_2008_06_20	DSE_0005_2008_08_11	DSE_0006_2008_06_20
MIMARKS_investigation	experimental_factor	Alphanumeric	None	None	None	None	None	None
MIMARKS_investigation	investigation_type	Alphanumeric	MIMARKS_Survey	MIMARKS_Survey	MIMARKS_Survey	MIMARKS_Survey	MIMARKS_Survey	MIMARKS_Survey
MIMARKS_investigation	project_name	Alphanumeric	Deep Sea Eukarya	Deep Sea Eukarya	Deep Sea Eukarya	Deep Sea Eukarya	Deep Sea Eukarya	Deep Sea Eukarya
MIMARKS_investigation	sample_type	Alphanumeric	sediment	sediment	sediment	sediment	sediment	sediment
MIMARKS_investigation	submit_to_insdc	Alphanumeric	SRP001223	SRP001223	SRP001223	SRP001223	SRP001223	SRP001223
MIMARKS_environment	collection_date	YYYY-MM-DDThh:mm:ss+/-NN	2002-03-09	2002-03-22	2002-03-23	2007-08-22	2007-08-22	2007-08-17
MIMARKS_environment	depth	meter	4060	2292	6326	3148	3148	686
MIMARKS_environment	environmental_zone	Alphanumeric	temperate	temperate	temperate	polar	polar	polar
MIMARKS_environment	envo_biome	Alphanumeric	marine abyssal zone biome	marine abyssal zone biome	marine abyssal zone biome	marine abyssal zone biome	marine abyssal zone biome	marine abyssal zone biome
MIMARKS_environment	envo_feature	Alphanumeric	abyssal plain	abyssal plain	abyssal plain	abyssal plain	abyssal plain	abyssal plain
MIMARKS_environment	envo_material	Alphanumeric	marine sediment	marine sediment	marine sediment	marine sediment	marine sediment	marine sediment
MIMARKS_environment	iho_area	Alphanumeric	Southern_Ocean	South_Atlantic_Ocean	South_Atlantic_Ocean	Arctic_Ocean	Arctic_Ocean	Arctic_Ocean
MIMARKS_environment	lat	decimalDegree	-65.2	-58.25	-58.5	83.6	84.9	82.6
MIMARKS_environment	lat_lon	+/-decimalDegree+/-decimalDegree	-65.2-48.5	-58.25-25	-58.5-23.58	+83.6+86.17	+84.9+60.53	+82.6+69.3
MIMARKS_environment	lon	decimalDegree	-48.5	-25	-23.58	86.17	60.53	69.3
MIMARKS_environment	longhurst_province	Alphanumeric	Polar - Austral Polar Province	Polar - Antarctic Province	Polar - Antarctic Province	Polar - Boreal Polar Province (POLR)	Polar - Boreal Polar Province (POLR)	Polar - Boreal Polar Province (POLR)
MIMARKS_environment	longhurst_zone_code	Alphanumeric	APLR	ANTA	ANTA	BPLR	BPLR	BPLR
MIMARKS_extension	env_package	Alphanumeric	sediment	sediment	sediment	sediment	sediment	sediment
MIMARKS_extension	depth_end	meter	4060	2292	6326	3148	3148	686
MIMARKS_extension	depth_start	meter	4060	2292	6326	3148	3148	686
MIMARKS_extension	redox_state	Alphanumeric	oxic	oxic	oxic	oxic	oxic	oxic
MIMARKS_nucleic_acid_sequence_source	samp_collect_device	Alphanumeric	Multicore	Multicore	Multicore	Multicore	Multicore	Multicore
MIMARKS_nucleic_acid_sequence_source	samp_mat_process	Alphanumeric	Frozen	Frozen	Frozen	Frozen	Frozen	Frozen
MIMARKS_nucleic_acid_sequence_source	samp_size	gram	0.35	0.7	0.7	0.35	0.7	0.7
MIMARKS_sequencing	domain	Alphanumeric	Eukarya	Eukarya	Eukarya	Eukarya	Eukarya	Eukarya
MIMARKS_sequencing	euk_lib_reads_seqd	integer_count	34737	15621	33233	12744	12578	13862
MIMARKS_sequencing	euk_multiplex_ident_1	Alphanumeric	CACTG	TAGTG	CAGCT	CGACG	AGATG	CTGCA
MIMARKS_sequencing	nucl_acid_amp	Alphanumeric	DOI:10.1371/journal.pone.0006372	DOI:10.1371/journal.pone.0006372	DOI:10.1371/journal.pone.0006372	DOI:10.1371/journal.pone.0006372	DOI:10.1371/journal.pone.0006372	DOI:10.1371/journal.pone.0006372
MIMARKS_sequencing	nucl_acid_ext	Alphanumeric	http://icomm.mbl.edu/microbis/project_pages/details/index.php?project=DSE	http://icomm.mbl.edu/microbis/project_pages/details/index.php?project=DSE	http://icomm.mbl.edu/microbis/project_pages/details/index.php?project=DSE	http://icomm.mbl.edu/microbis/project_pages/details/index.php?project=DSE	http://icomm.mbl.edu/microbis/project_pages/details/index.php?project=DSE	http://icomm.mbl.edu/microbis/project_pages/details/index.php?project=DSE
MIMARKS_sequencing	pcr_cond	Alphanumeric	initial denaturation:94degC_4min;denaturation:94degC_45sec;annealing:55degC_45sec;elongation:72degC_1min;final elongation:72degC_10 min;28 cycles	initial denaturation:94degC_4min;denaturation:94degC_45sec;annealing:55degC_45sec;elongation:72degC_1min;final elongation:72degC_10 min;28 cycles	initial denaturation:94degC_4min;denaturation:94degC_45sec;annealing:55degC_45sec;elongation:72degC_1min;final elongation:72degC_10 min;28 cycles	initial denaturation:94degC_4min;denaturation:94degC_45sec;annealing:55degC_45sec;elongation:72degC_1min;final elongation:72degC_10 min;28 cycles	initial denaturation:94degC_4min;denaturation:94degC_45sec;annealing:55degC_45sec;elongation:72degC_1min;final elongation:72degC_10 min;28 cycles	initial denaturation:94degC_4min;denaturation:94degC_45sec;annealing:55degC_45sec;elongation:72degC_1min;final elongation:72degC_10 min;28 cycles
MIMARKS_sequencing	pcr_primers	Alphanumeric	1380FWD:CCCTGCCHTTTGTACACAC; 1389FWD:TTGTACACACCGCCC; 1510REV:CCTTCYGCAGGTTCACCTAC	1380FWD:CCCTGCCHTTTGTACACAC; 1389FWD:TTGTACACACCGCCC; 1510REV:CCTTCYGCAGGTTCACCTAC	1380FWD:CCCTGCCHTTTGTACACAC; 1389FWD:TTGTACACACCGCCC; 1510REV:CCTTCYGCAGGTTCACCTAC	1380FWD:CCCTGCCHTTTGTACACAC; 1389FWD:TTGTACACACCGCCC; 1510REV:CCTTCYGCAGGTTCACCTAC	1380FWD:CCCTGCCHTTTGTACACAC; 1389FWD:TTGTACACACCGCCC; 1510REV:CCTTCYGCAGGTTCACCTAC	1380FWD:CCCTGCCHTTTGTACACAC; 1389FWD:TTGTACACACCGCCC; 1510REV:CCTTCYGCAGGTTCACCTAC
MIMARKS_sequencing	sequencing_meth	Alphanumeric	GS FLX LR70 454 pyrosequencing	GS FLX LR70 454 pyrosequencing	GS FLX LR70 454 pyrosequencing	GS FLX LR70 454 pyrosequencing	GS FLX LR70 454 pyrosequencing	GS FLX LR70 454 pyrosequencing
MIMARKS_sequencing	target_gene	Alphanumeric	18S rRNA	18S rRNA	18S rRNA	18S rRNA	18S rRNA	18S rRNA
MIMARKS_sequencing	target_subfragment	Alphanumeric	V9	V9	V9	V9	V9	V9
MIMARKS_sequencing	url	Alphanumeric	http://icomm.mbl.edu/microbis;http://vamps.mbl.edu	http://icomm.mbl.edu/microbis;http://vamps.mbl.edu	http://icomm.mbl.edu/microbis;http://vamps.mbl.edu	http://icomm.mbl.edu/microbis;http://vamps.mbl.edu	http://icomm.mbl.edu/microbis;http://vamps.mbl.edu	http://icomm.mbl.edu/microbis;http://vamps.mbl.edu
